# Supplementary material for: Association of Circulating Trimethylamine N-Oxide and Its Dietary Determinants with the Risk of Kidney Graft Failure: Results of the TransplantLines Cohort Study
Source: PubMed Central journal article supplement (PMC7831477; doi:10.3390/nu13010262), 2021-01-18
Supplement: nutrients-13-00262-s001.pdf [file nutrients-13-00262-s001.pdf]

**Supplemental Table 1.** STROBE Statement—Checklist of items that should be included in reports of cohort studies

|                          | Item No | Recommendation                                                                                                                                                                                                    | Page No |
|--------------------------|---------|-------------------------------------------------------------------------------------------------------------------------------------------------------------------------------------------------------------------|---------|
| Title and abstract       | 1       | (a) Indicate the study’s design with a commonly used term in the title or the abstract                                                                                                                            | 1       |
|                          |         | (b) Provide in the abstract an informative and balanced summary of what was done and what was found                                                                                                               | 4       |
| Introduction             |         |                                                                                                                                                                                                                   |         |
| Background/rationale     | 2       | Explain the scientific background and rationale for the investigation being reported                                                                                                                              | 5       |
| Objectives               | 3       | State specific objectives, including any prespecified hypotheses                                                                                                                                                  | 6       |
| Methods                  |         |                                                                                                                                                                                                                   |         |
| Study design             | 4       | Present key elements of study design early in the paper                                                                                                                                                           | 7       |
| Setting                  | 5       | Describe the setting, locations, and relevant dates, including periods of recruitment, exposure, follow-up, and data collection                                                                                   | 7       |
| Participants             | 6       | (a) Give the eligibility criteria, and the sources and methods of selection of participants. Describe methods of follow-up<br>(b) For matched studies, give matching criteria and number of exposed and unexposed | 7       |
| Variables                | 7       | Clearly define all outcomes, exposures, predictors, potential confounders, and effect modifiers. Give diagnostic criteria, if applicable                                                                          | 9,10    |
| Data sources/measurement | 8       | For each variable of interest, give sources of data and details of methods of assessment (measurement). Describe comparability of assessment methods if there is more than one group                              | 7,8     |
| Bias                     | 9       | Describe any efforts to address potential sources of bias                                                                                                                                                         | 7-10    |
| Study size               | 10      | Explain how the study size was arrived at                                                                                                                                                                         | 7       |
| Quantitative variables   | 11      | Explain how quantitative variables were handled in the analyses. If applicable, describe which groupings were chosen and why                                                                                      | 9,10    |
| Statistical methods      | 12      | (a) Describe all statistical methods, including those used to control for confounding                                                                                                                             | 9-11    |
|                          |         | (b) Describe any methods used to examine subgroups and interactions                                                                                                                                               | NA      |
|                          |         | (c) Explain how missing data were addressed                                                                                                                                                                       | 7       |

|                   |     |                                                                                                                                                                                                              |          |
|-------------------|-----|--------------------------------------------------------------------------------------------------------------------------------------------------------------------------------------------------------------|----------|
|                   |     | (d) If applicable, explain how loss to follow-up was addressed                                                                                                                                               |          |
|                   |     | (e) Describe any sensitivity analyses                                                                                                                                                                        |          |
| Results           |     |                                                                                                                                                                                                              |          |
| Participants      | 13* | (a) Report numbers of individuals at each stage of study—eg numbers potentially eligible, examined for eligibility, confirmed eligible, included in the study, completing follow-up, and analysed            | 7        |
|                   |     | (b) Give reasons for non-participation at each stage                                                                                                                                                         | 7        |
|                   |     | (c) Consider use of a flow diagram                                                                                                                                                                           |          |
| Descriptive data  | 14  | (a) Give characteristics of study participants (eg demographic, clinical, social) and information on exposures and potential confounders                                                                     | 12,29-31 |
|                   |     | (b) Indicate number of participants with missing data for each variable of interest                                                                                                                          | 7        |
|                   |     | (c) Summarise follow-up time (eg, average and total amount)                                                                                                                                                  | 13       |
| Outcome data      | 15  | Report numbers of outcome events or summary measures over time                                                                                                                                               | 13       |
| Main results      | 16  | (a) Give unadjusted estimates and, if applicable, confounder-adjusted estimates and their precision (eg, 95% confidence interval). Make clear which confounders were adjusted for and why they were included | 13,14,35 |
|                   |     | (b) Report category boundaries when continuous variables were categorized                                                                                                                                    | 29       |
|                   |     | (c) If relevant, consider translating estimates of relative risk into absolute risk for a meaningful time period                                                                                             | 12, 33   |
| Other analyses    | 17  | Report other analyses done—eg analyses of subgroups and interactions, and sensitivity analyses                                                                                                               | S5-S8    |
| Discussion        |     |                                                                                                                                                                                                              |          |
| Key results       | 18  | Summarise key results with reference to study objectives                                                                                                                                                     | 16       |
| Limitations       | 19  | Discuss limitations of the study, taking into account sources of potential bias or imprecision. Discuss both direction and magnitude of any potential bias                                                   | 19       |
| Interpretation    | 20  | Give a cautious overall interpretation of results considering objectives, limitations, multiplicity of analyses, results from similar studies, and other relevant evidence                                   | 18,19    |
| Generalisability  | 21  | Discuss the generalisability (external validity) of the study results                                                                                                                                        | 18       |
| Other information |     |                                                                                                                                                                                                              | 17       |

|         |    |                                                                                                                                                               |    |
|---------|----|---------------------------------------------------------------------------------------------------------------------------------------------------------------|----|
| Funding | 22 | Give the source of funding and the role of the funders for the present study and, if applicable, for the original study on which the present article is based | 20 |
|---------|----|---------------------------------------------------------------------------------------------------------------------------------------------------------------|----|

**Supplemental Table 2.** Reclassification table of RTRs.

|               |             | Updated Model                        |            |             |      | RTR reclassified (%) |
|---------------|-------------|--------------------------------------|------------|-------------|------|----------------------|
|               |             | RTRs in Risk categories ( <i>n</i> ) |            |             |      |                      |
|               |             | Low                                  | Medium low | Medium high | High |                      |
| Initial Model | Low         | 188                                  | 19         | 2           | 0    | 10                   |
|               | Medium low  | 22                                   | 34         | 10          | 0    | 48                   |
|               | Medium high | 7                                    | 15         | 38          | 13   | 48                   |
|               | High        | 0                                    | 2          | 15          | 83   | 17                   |

**Supplemental Table 3. Diet components in subjects at the third TMAO tertile.**

|                                       | <b>Median (IQ range)</b> | <b>Mean (SD)</b> | <b>Population mean consumption[1]</b> |
|---------------------------------------|--------------------------|------------------|---------------------------------------|
| <b>Egg intake, g/day</b>              | 8.92(7.14,14.28)         | 12.68 (9.9)      | 12                                    |
| <b>Vegetable Intake, g/day</b>        | 95.75(65.83,140.15)      | 106.81 (70.1)    | 127                                   |
| <b>Fruit Intake, g/day</b>            | 99.43(52.71,191.41)      | 121.25 (84.8)    | 122                                   |
| <b>Fish and Seafood Intake, g/day</b> | 14.87(4.679,22.95)       | 17.242 (16.0)    | 15                                    |

**Supplemental Table 4.** Comparison of Standardized Net Benefits of two predictive models.

| <b>Risk Threshold</b> | <b>Traditional Model</b> | <b>TMAO &amp; Diet enriched Model</b> |
|-----------------------|--------------------------|---------------------------------------|
| 0.1                   | 0.646                    | 0.653                                 |
| 0.2                   | 0.466                    | 0.509                                 |
| 0.3                   | 0.333                    | 0.360                                 |
| 0.4                   | 0.247                    | 0.276                                 |
| 0.5                   | 0.155                    | 0.207                                 |
| 0.6                   | 0.103                    | 0.207                                 |
| 0.7                   | 0.017                    | 0.080                                 |

## Supplemental Figure 1. A

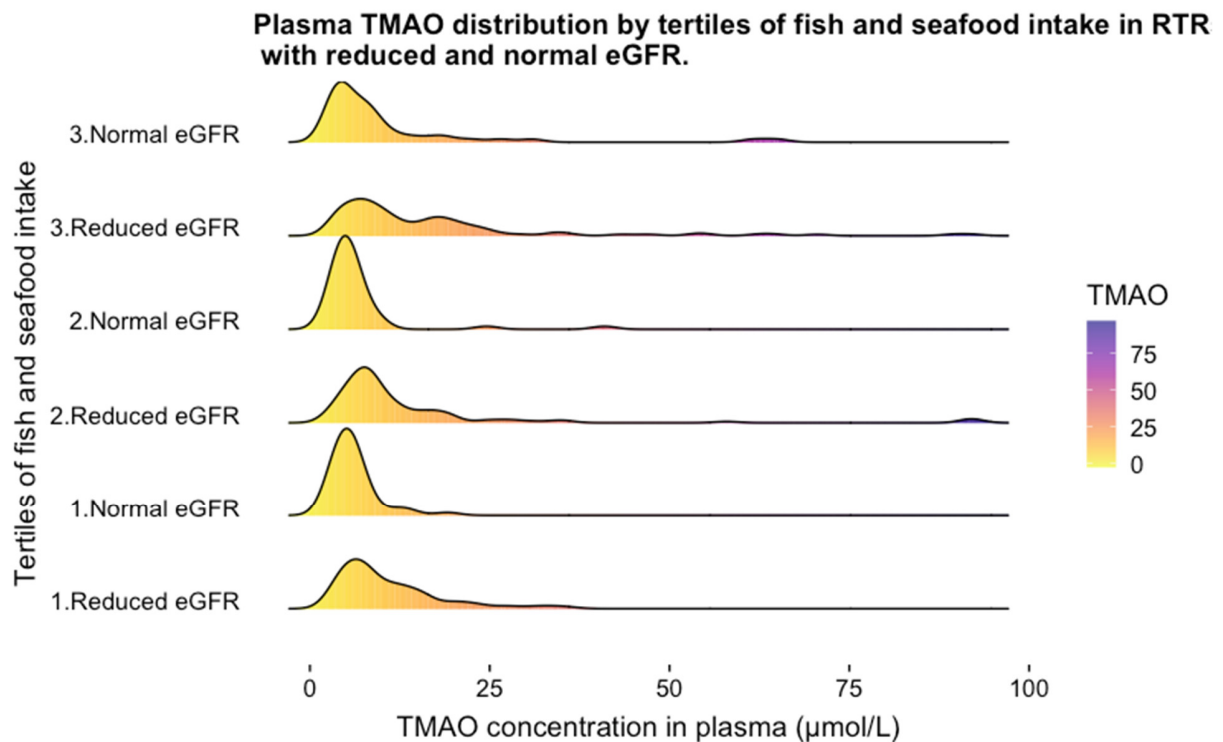

Tertiles of fish and seafood intake in RTRs with reduced eGFR ( $<60 \text{ ml/min} \cdot 1.73\text{m}^2$ )

- 1.Reduced eGFR = 0 – 7.55 g/day
- 2.Reduced eGFR = 7.55 – 17.1 g/day
- 3.Reduced eGFR = 17.1 – 106 g/day

Tertiles of fish and seafood intake in RTRs with normal eGFR ( $\geq 60 \text{ ml/min} \cdot 1.73\text{m}^2$ )

- 1.Normal eGFR = 0 – 4.69 g/day
- 2.Normal eGFR = 4.69 – 15.7 g/day
- 3.Normal eGFR = 15.7 – 80.8 g/day

## Supplemental Figure 1. B

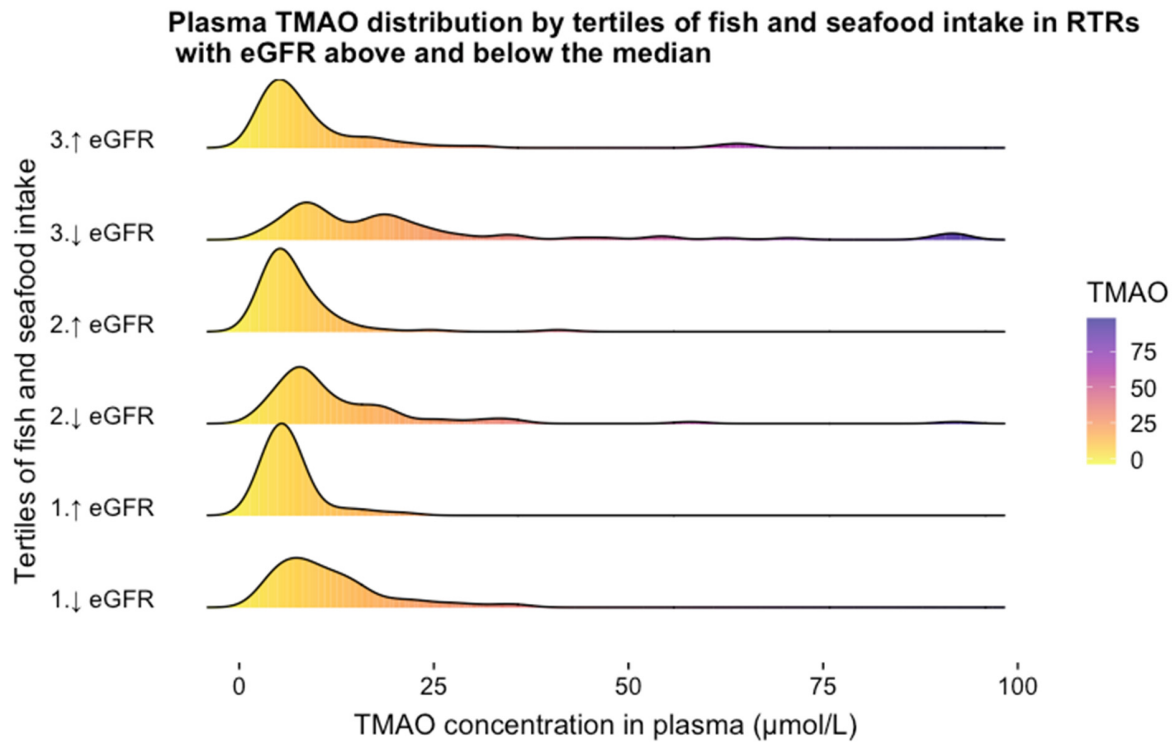

Tertiles of fish and seafood intake in RTRs with eGFR below the median ( $< 47.96 \text{ ml/min} * 1.73\text{m}^2$ )

1. ↓ eGFR = 0 – 6.45 g/day
2. ↓ eGFR = 6.45 – 16.7 g/day
3. ↓ eGFR = 16.7 – 106 g/day

Tertiles of fish and seafood intake in RTRs with eGFR above the median ( $\geq 47.96 \text{ ml/min} * 1.73\text{m}^2$ )

1. ↑ eGFR = 0 – 6.97 g/day
2. ↑ eGFR = 6.97 – 16.8 g/day
3. ↑ eGFR = 16.8 – 80.8 g/day



## Supplemental Figure 2.A

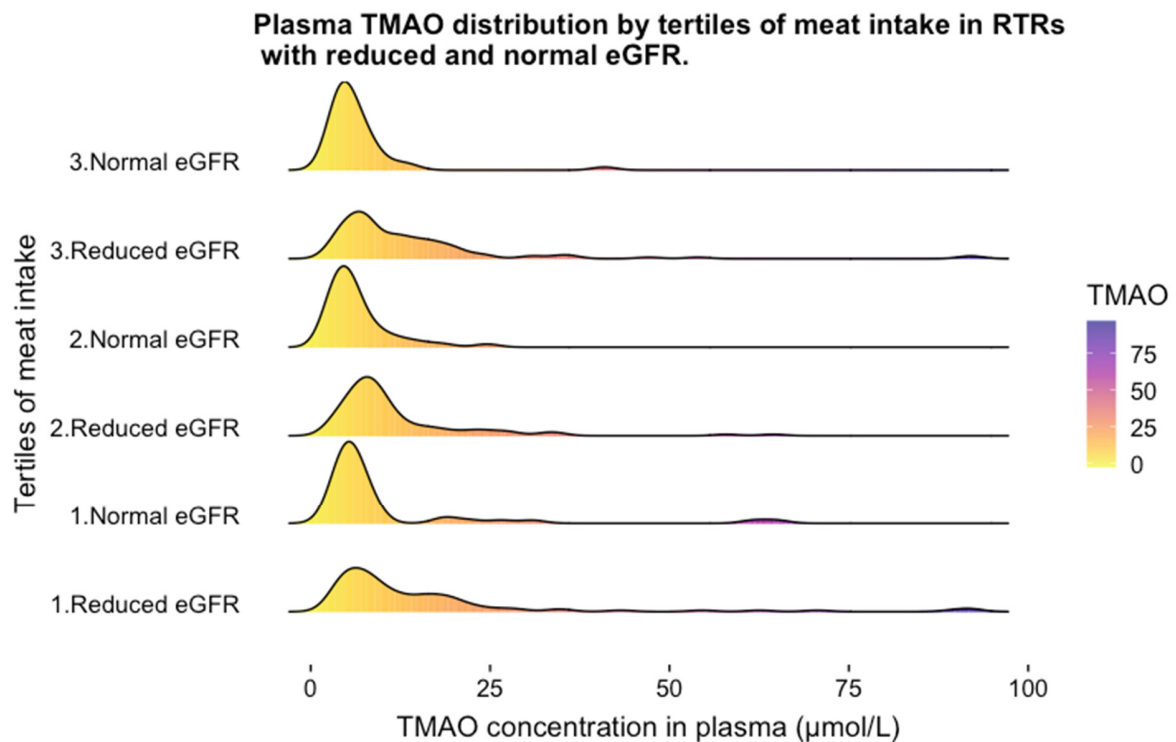

Tertiles of meat intake in RTRs with reduced eGFR ( $< 60 \text{ ml/min} \cdot 1.73\text{m}^2$ )

1. Reduced eGFR = 0.1 – 71.4 g/day
2. Reduced eGFR = 71.4 – 93.5 g/day
3. Reduced eGFR = 93.5 – 270 g/day

Tertiles of meat intake in RTRs with normal eGFR ( $\geq 60 \text{ ml/min} \cdot 1.73\text{m}^2$ )

1. Normal eGFR = 0.1 – 70 g/day
2. Normal eGFR = 70 – 97.4 g/day
3. Normal eGFR = 97.4 – 158 g/day

## Supplemental Figure 2.B

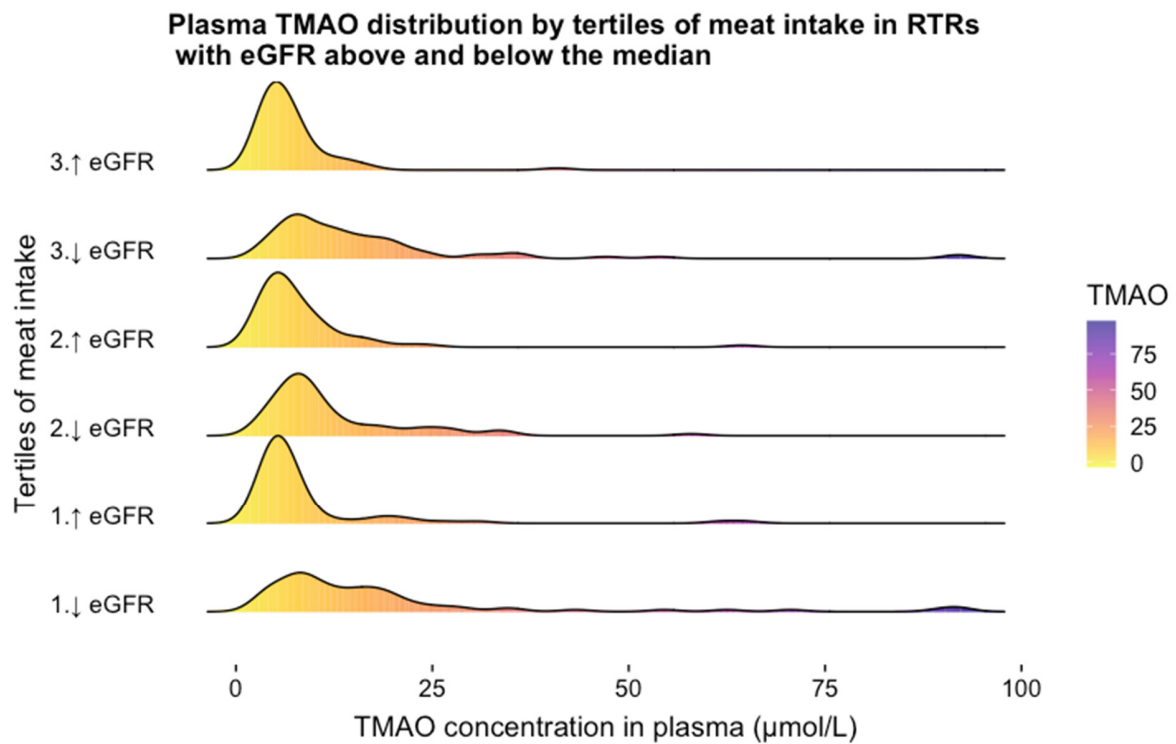

Tertiles of meat intake in RTRs with eGFR below the median ( $<47.96 \text{ ml/min} * 1.73\text{m}^2$ )

1. ↓ eGFR = 0.1 – 70 g/day
2. ↓ eGFR = 70 – 93.4 g/day
3. ↓ eGFR = 93.4 – 205 g/day

Tertiles of meat intake in RTRs with eGFR above the median ( $\geq 47.96 \text{ ml/min} * 1.73\text{m}^2$ )

1. ↑ eGFR = 0.1 – 71.3 g/day
2. ↑ eGFR = 71.3 – 96.1 g/day
3. ↑ eGFR = 96.1 – 270 g/day

Supplemental Figure 3.

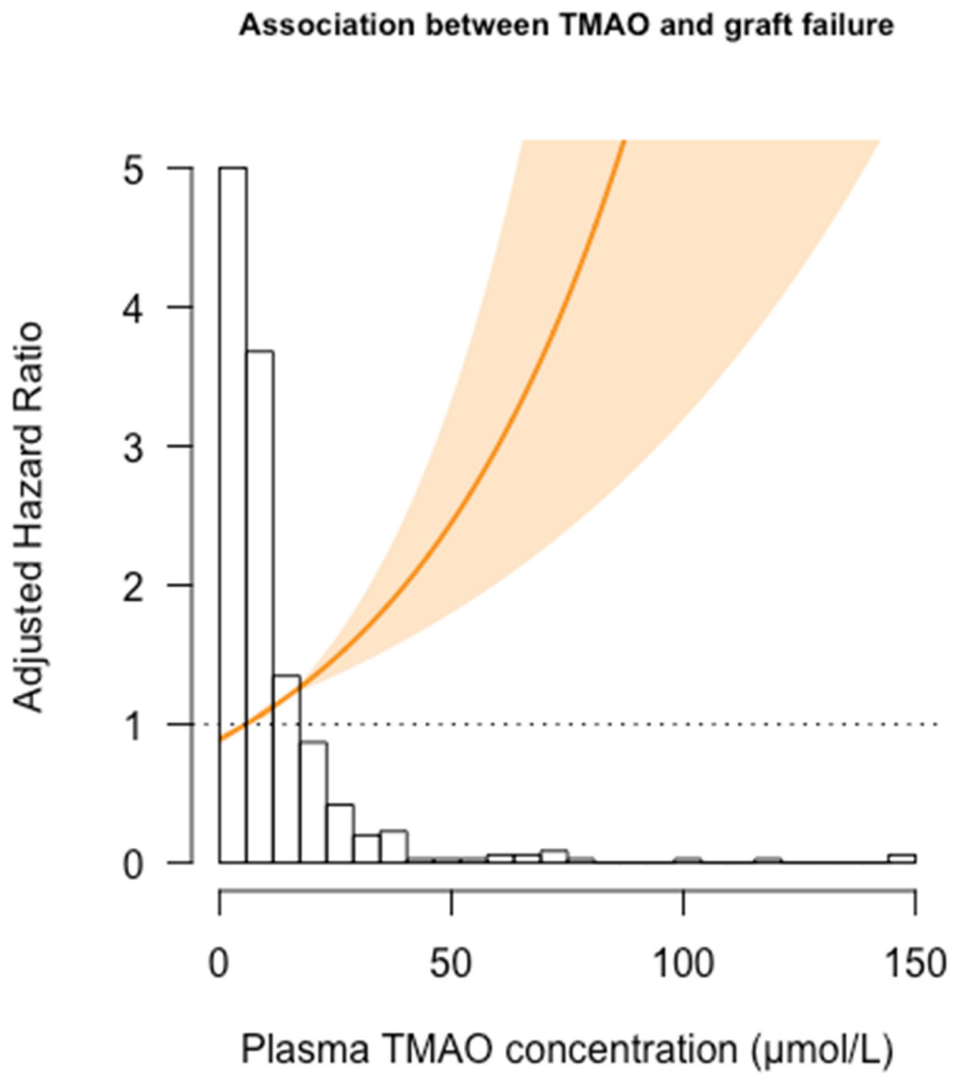

## Supplemental References.

1. The diet of the Dutch: Results of the first two years of the Dutch National Food Consumption Survey 2012-2016 | RIVM. <https://www.rivm.nl/publicaties/diet-of-dutch-results-of-first-two-years-of-dutch-national-food-consumption-survey-2012>. Accessed 22 Dec 2020
